# Supplementary material for: Effect of alkali and alkaline earth metal ions on benzyl alcohol oxidation activity of titanate nanotube-supported Au catalysts
Source: Royal Society of Chemistry journal article supplement (doi:10.1039/c5ra06496a), 2015-01-01
Supplement: c5ra06496a1.pdf [file c5ra06496a1.pdf]

## Supplementary Data

### Effect of alkali and alkaline earth metal ions on benzyl alcohol oxidation activity of titanate nanotubes-supported Au catalysts

Devadutta Nepak<sup>ab</sup> and D. Srinivas<sup>\*ab</sup>

<sup>a</sup>*Catalysis Division, CSIR-National Chemical Laboratory, Pune—411008, India. E-mail: d.srinivas@ncl.res.in; Fax: +91 20 2590 2633; Tel: +91 20 2590 2018*

<sup>b</sup>*Academy of Scientific and Innovative Research (AcSIR), New Delhi—110 001, India*

- 
- S1** XRD patterns of supported gold catalysts.
- S2** N<sub>2</sub> adsorption-desorption data for ATNT supports.
- S3** CO<sub>2</sub>-TPD profiles of Au/ATNT catalysts.
- S4** Influence of basicity of the catalyst on uptake and mean particle size of Au.
- S5** DRUV-vis spectra for Au/ATNT catalysts.
- S6** XPS profiles of Au(1 wt.%) on KTNT, SrTNT and BaTNT in Au 4f region and of Au-Pd(1:1, 2 wt.)/BaTNT in Au 4f & Pd 3d regions.
- S7** Correlation between BE values and catalytic activity (TOF, h<sup>-1</sup>) of Au.
- S8** Influence of reaction time and catalyst amount on conversion of benzyl alcohol and selectivity for benzaldehyde. Reaction conditions: Left - catalyst = 0.05 g, benzyl alcohol = 25 mmol, p(O<sub>2</sub>) = 1 atm, reaction temperature = 120 °C, and reaction time = 0 - 25 h. Right - catalyst = 0.025 – 0.15 g, benzyl alcohol = 25 mmol, p(O<sub>2</sub>) = 1 atm, reaction temperature = 120 °C, and reaction time = 10 h.
- S9** Influence of reaction temperature on the conversion of benzyl alcohol and selectivity of benzaldehyde. Reaction conditions: catalyst = 0.05 g, benzyl alcohol = 25 mmol, p(O<sub>2</sub>) = 1 atm, reaction temperature = 80-120 °C, and reaction time = 10 h.
- S10** Influence of (a) catalyst amount, (b) reaction temperature and (c) reaction time on the catalytic activity and product selectivity of Au(1 wt%) and Au-Pd (2 wt%, 1:1) supported on BaTNT.
- S11** Hot filtration test. Conditions: Au(1 wt%)/BaTNT = 0.05 g, benzyl alcohol = 25 mmol, p(O<sub>2</sub>) = 1 atm, temperature = 120 °C, and reaction time = 10 h.

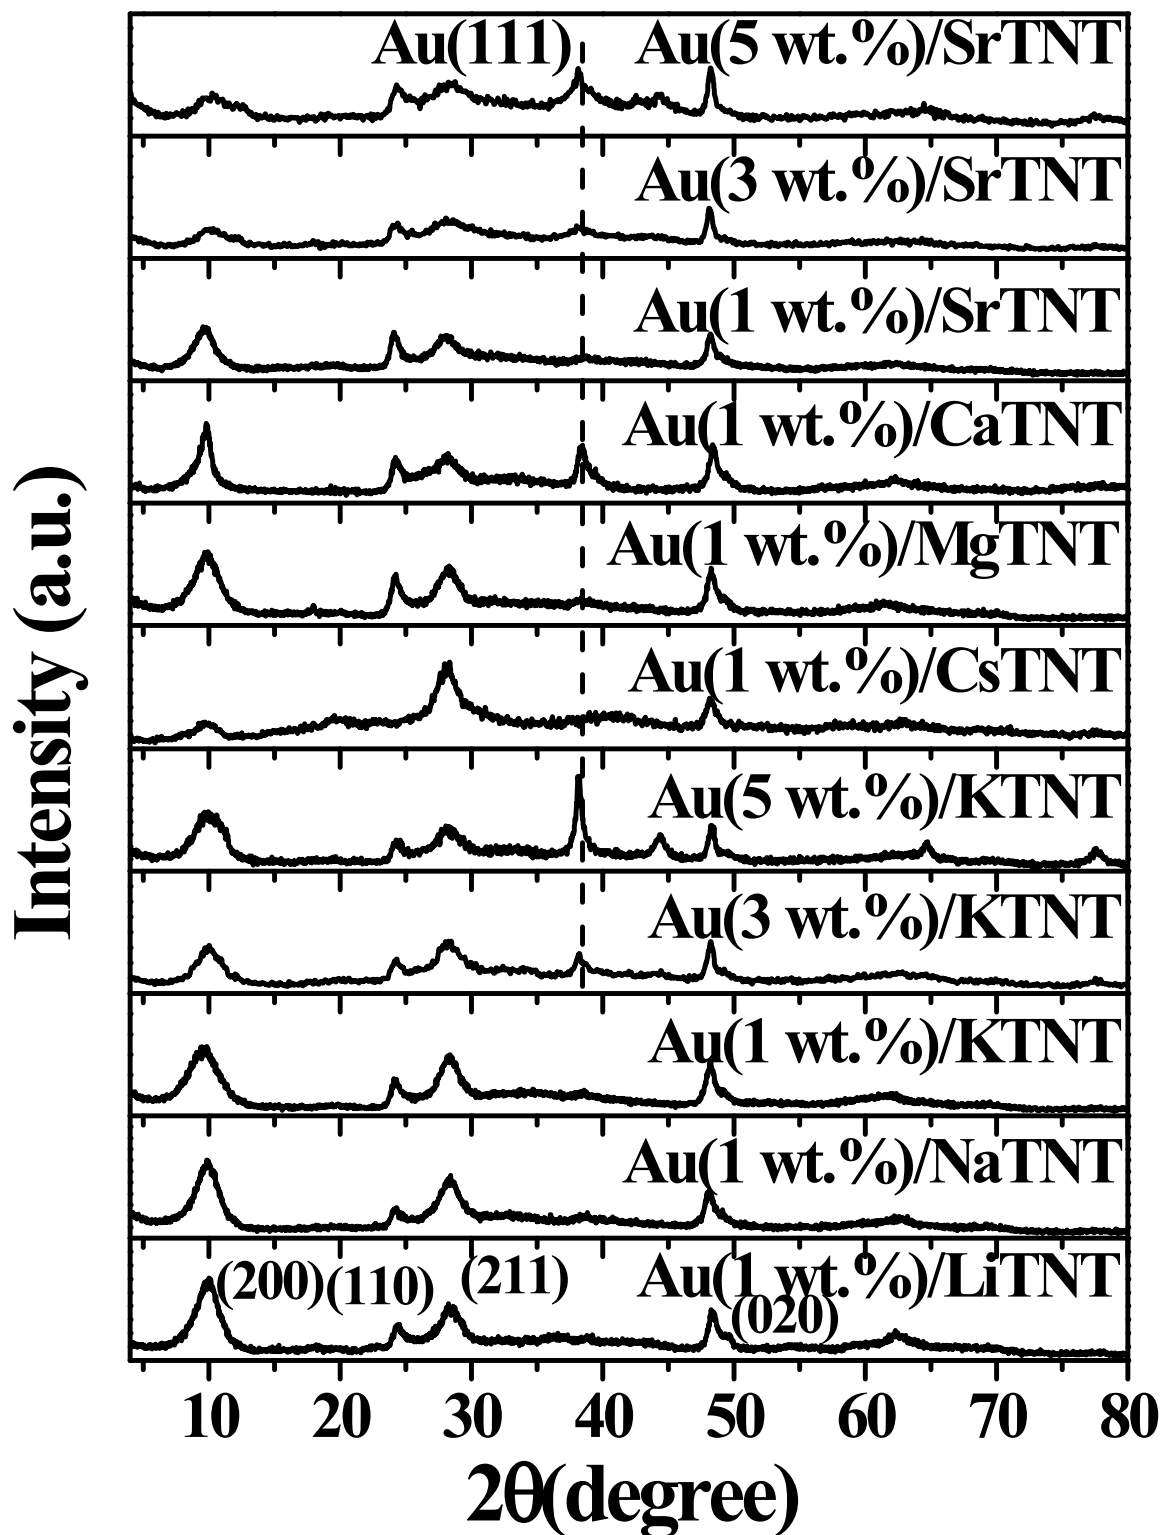

S1. XRD patterns of supported gold catalysts.

| S.No. | Sample | Textural properties                  |                                  |                    |
|-------|--------|--------------------------------------|----------------------------------|--------------------|
|       |        | $S_{\text{BET}}$ (m <sup>2</sup> /g) | Pore volume (cm <sup>3</sup> /g) | Pore diameter (nm) |
| 1     | LiTNT  | 196                                  | 0.54                             | 5.2                |
| 2     | NaTNT  | 188                                  | 0.65                             | 6.5                |
| 3     | KTNT   | 194                                  | 0.47                             | 4.5                |
| 4     | CsTNT  | 132                                  | 0.36                             | 4.8                |
| 5     | MgTNT  | 179                                  | 0.41                             | 6.6                |
| 6     | CaTNT  | 185                                  | 0.55                             | 6.2                |
| 7     | SrTNT  | 182                                  | 0.48                             | 5.8                |
| 8     | BaTNT  | 175                                  | 0.40                             | 6.0                |

**S2.** N<sub>2</sub> physisorption data for ATNT supports.

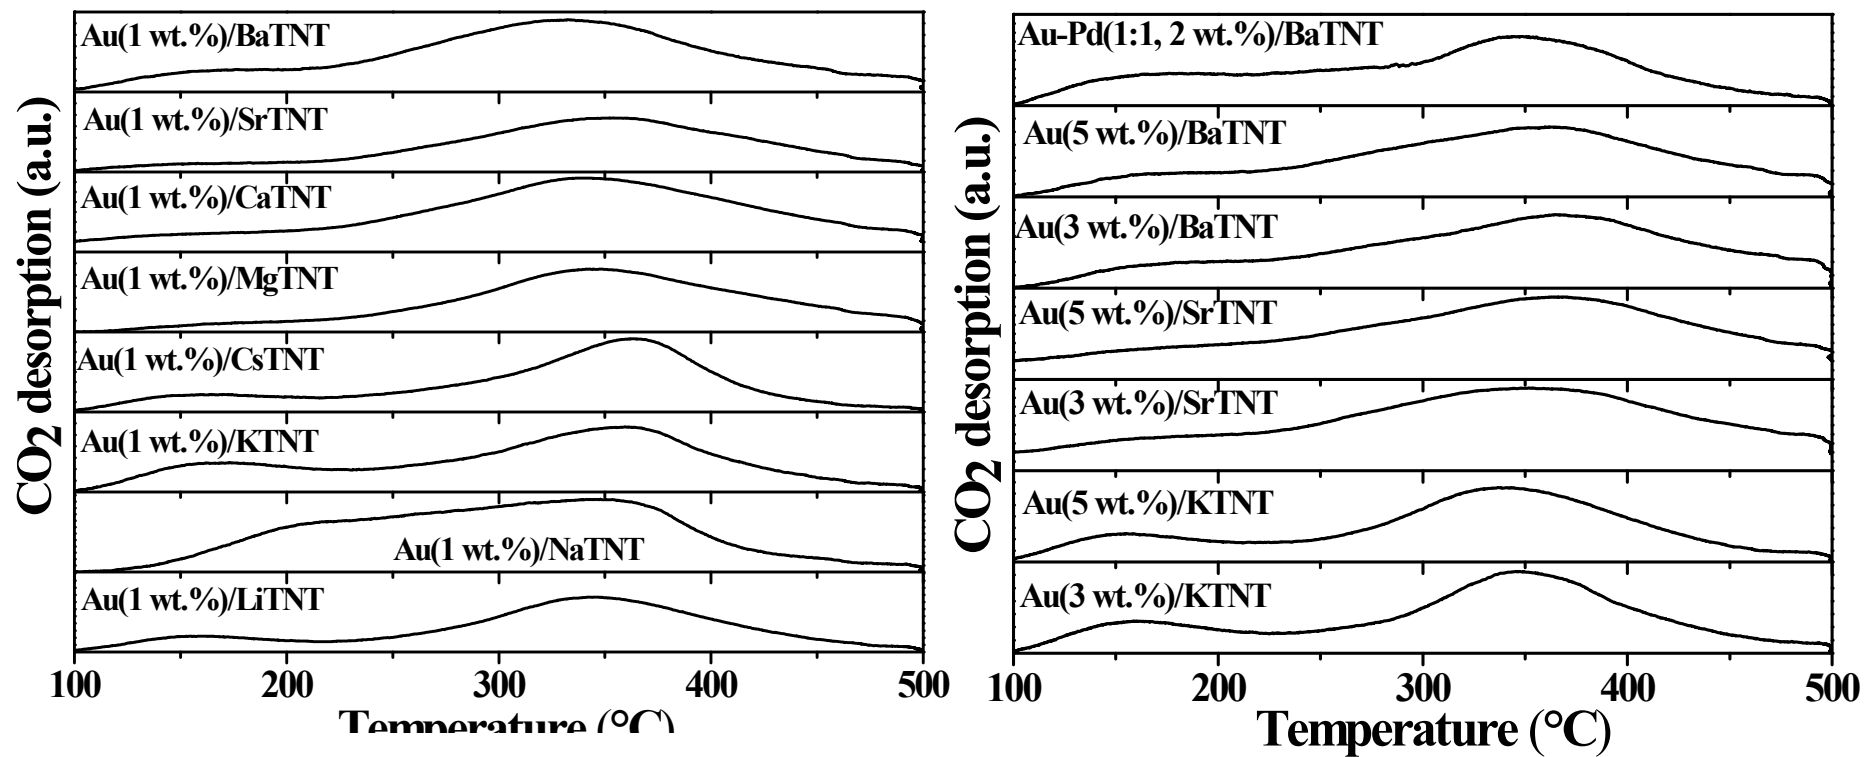

S3. CO<sub>2</sub>-TPD profiles of Au/ATNT catalysts

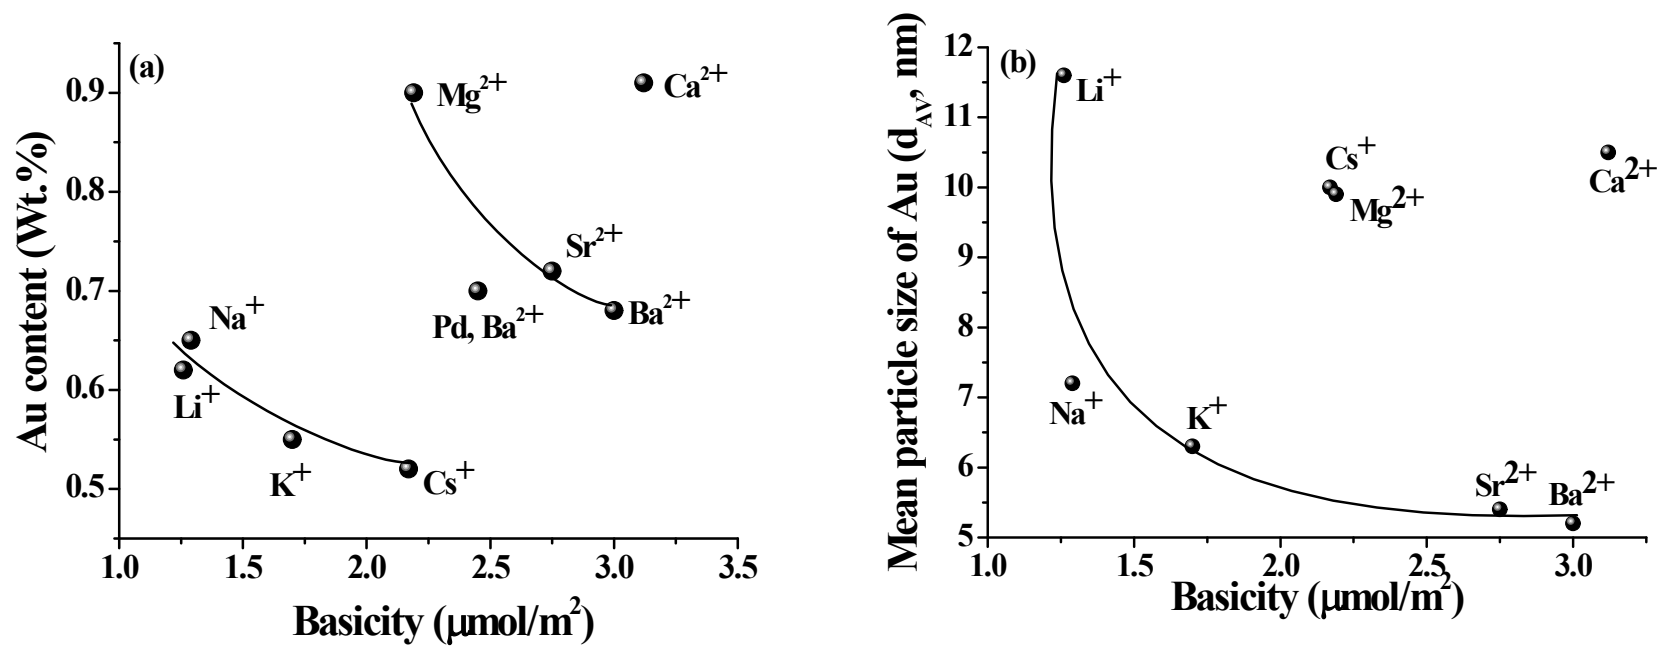

S4. Influence of basicity of the catalyst on (a) Au uptake and (b) mean particle size of Au.

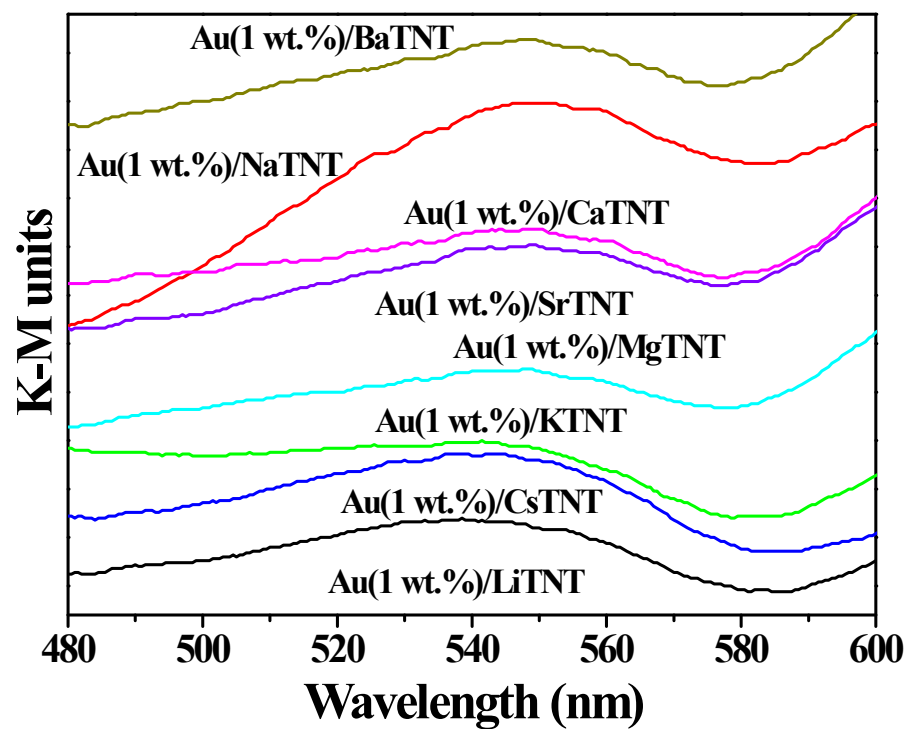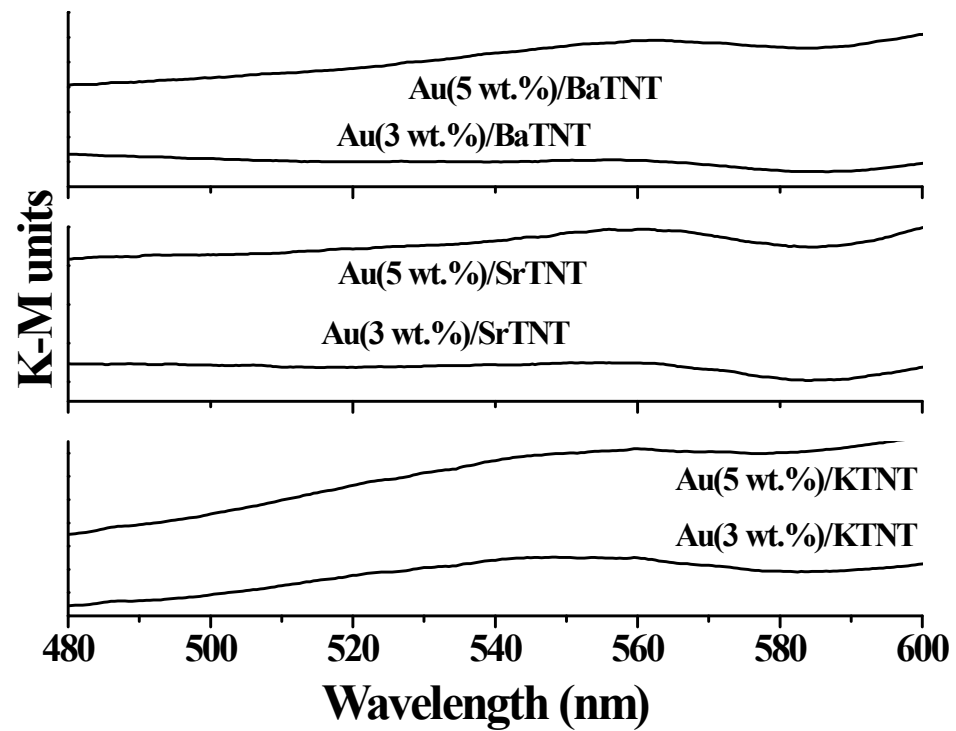

S5. DRUV-vis spectra for Au/ATNT catalysts.

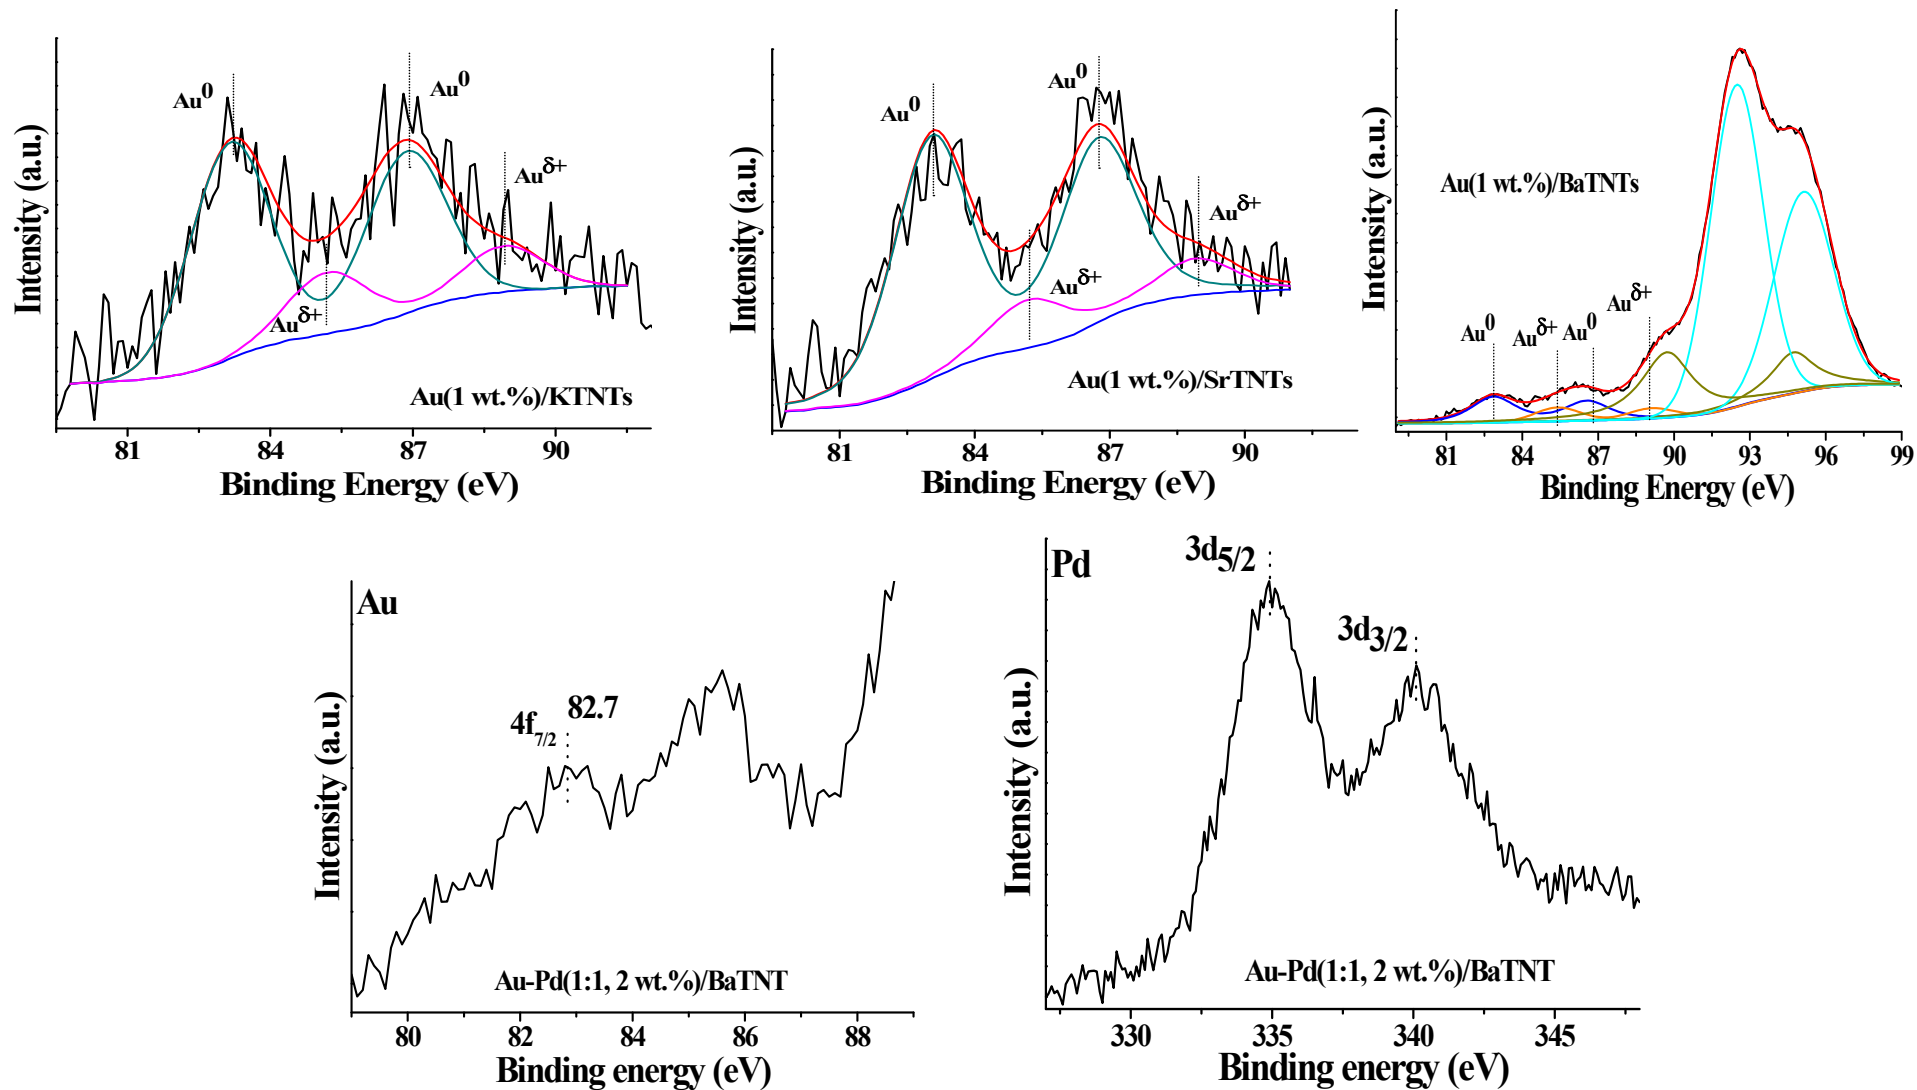

S6. XPS profiles of Au(1 wt.%) on KTNT, SrTNT and BaTNT in Au 4f region and of Au-Pd(1:1, 2 wt.%) / BaTNT in Au 4f & Pd 3d regions

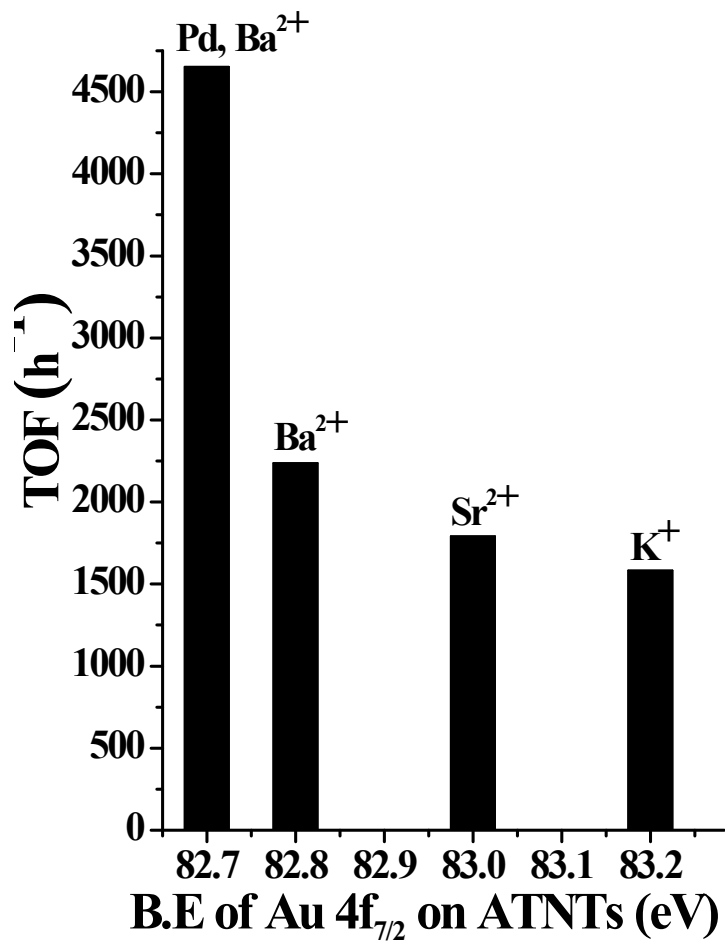

S7. Correlation between B.E. values and catalytic activity (TOF, h<sup>-1</sup>) of Au.



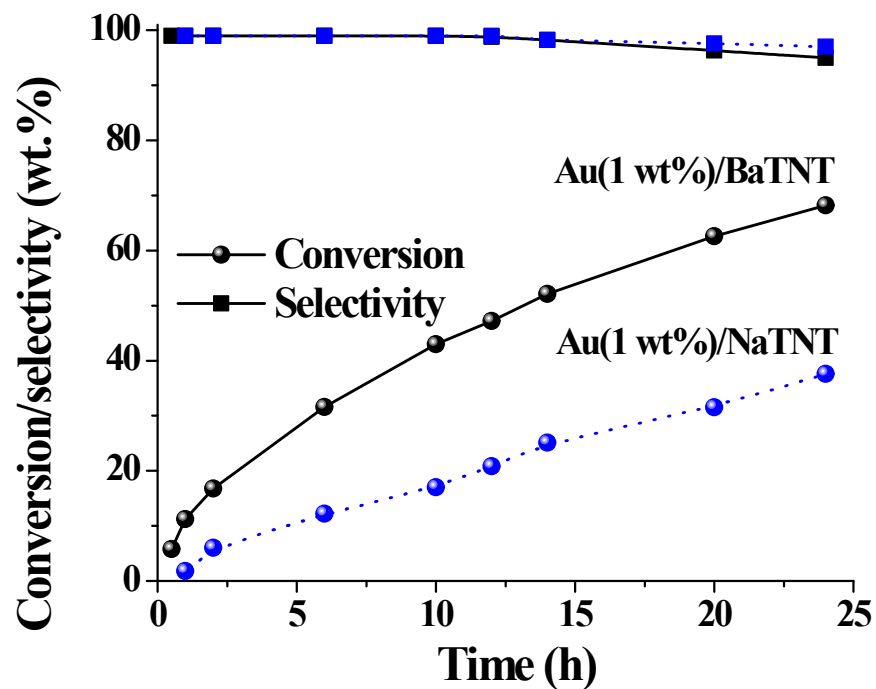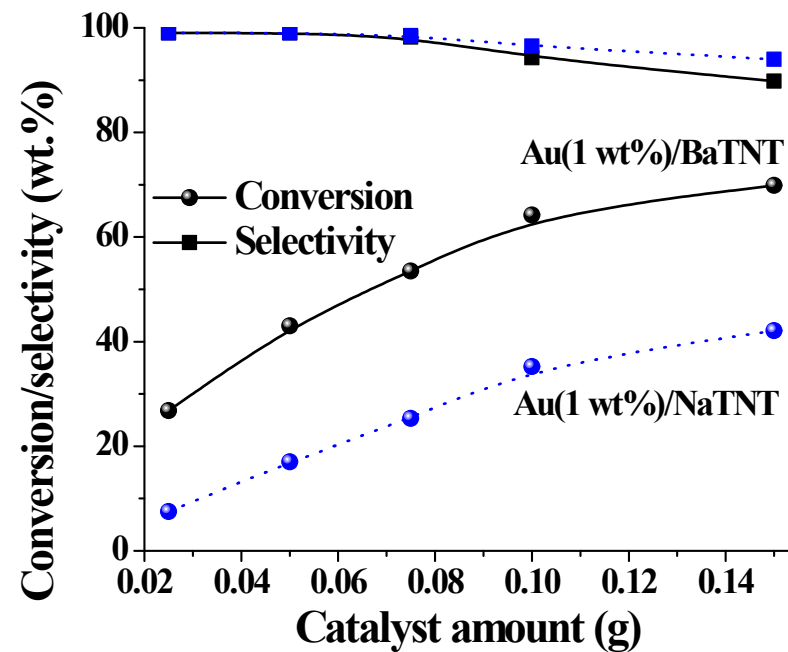

S8. Influence of reaction time and catalyst amount on conversion of benzyl alcohol and selectivity for benzaldehyde. Reaction conditions: Left - catalyst = 0.05 g, benzyl alcohol = 25 mmol,  $p(\text{O}_2)$  = 1 atm, reaction temperature = 120 °C, and reaction time = 0 - 25 h. Right - catalyst = 0.025 - 0.15 g, benzyl alcohol = 25 mmol,  $p(\text{O}_2)$  = 1 atm, reaction temperature = 120 °C, and reaction time = 10 h.

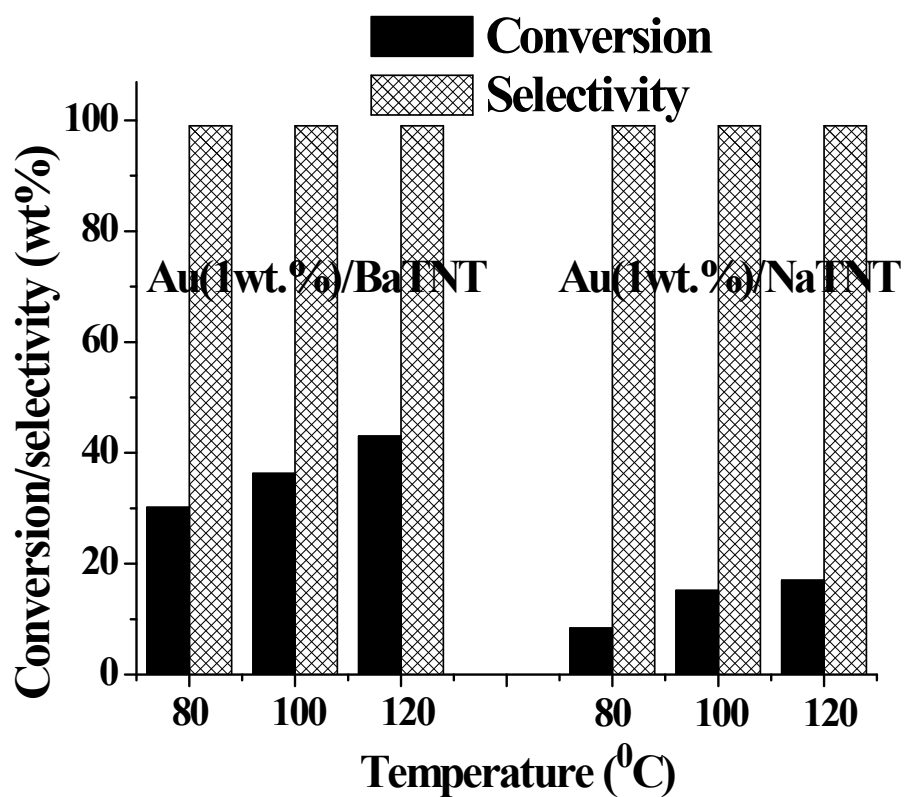

**S9.** Influence of reaction temperature on the conversion of benzyl alcohol and selectivity of benzaldehyde. Reaction conditions: catalyst = 0.05 g, benzyl alcohol = 25 mmol,  $p(\text{O}_2) = 1$  atm, reaction temperature = 80-120 °C, and reaction time = 10 h.

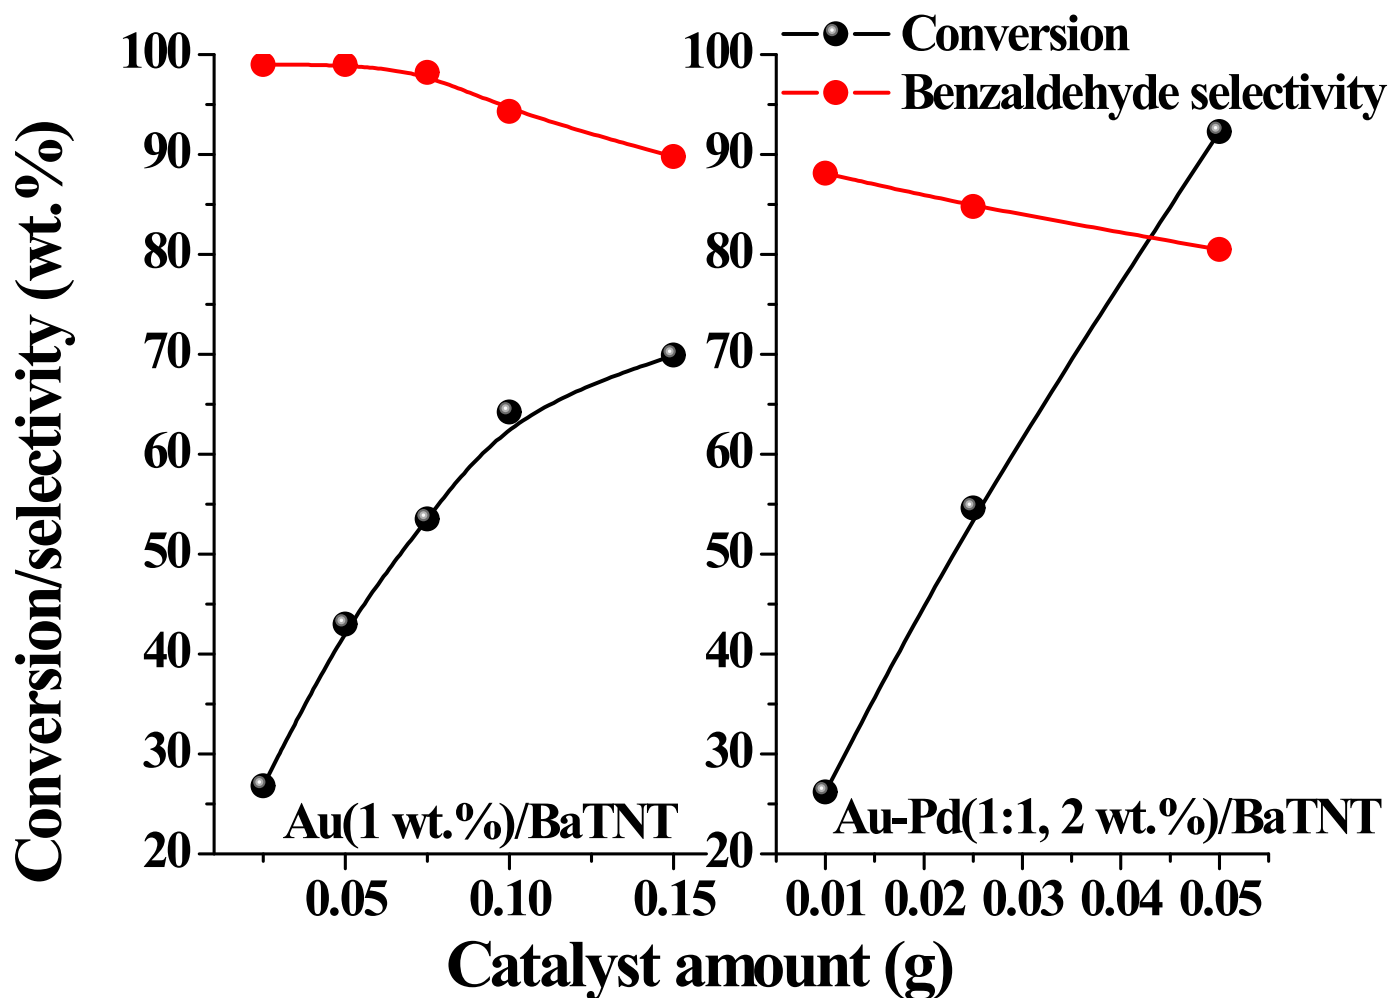

**S10 (a)** Influence of catalyst amount on the catalytic activity and product selectivity of Au(1 wt%) and Au-Pd (2 wt%, 1:1) supported on BaTNT. Reaction conditions: benzyl alcohol = 25 mmol,  $p(\text{O}_2) = 1 \text{ atm}$ , reaction temperature = 120 °C and reaction time = 10 h for Au and 5 h for Au-Pd.

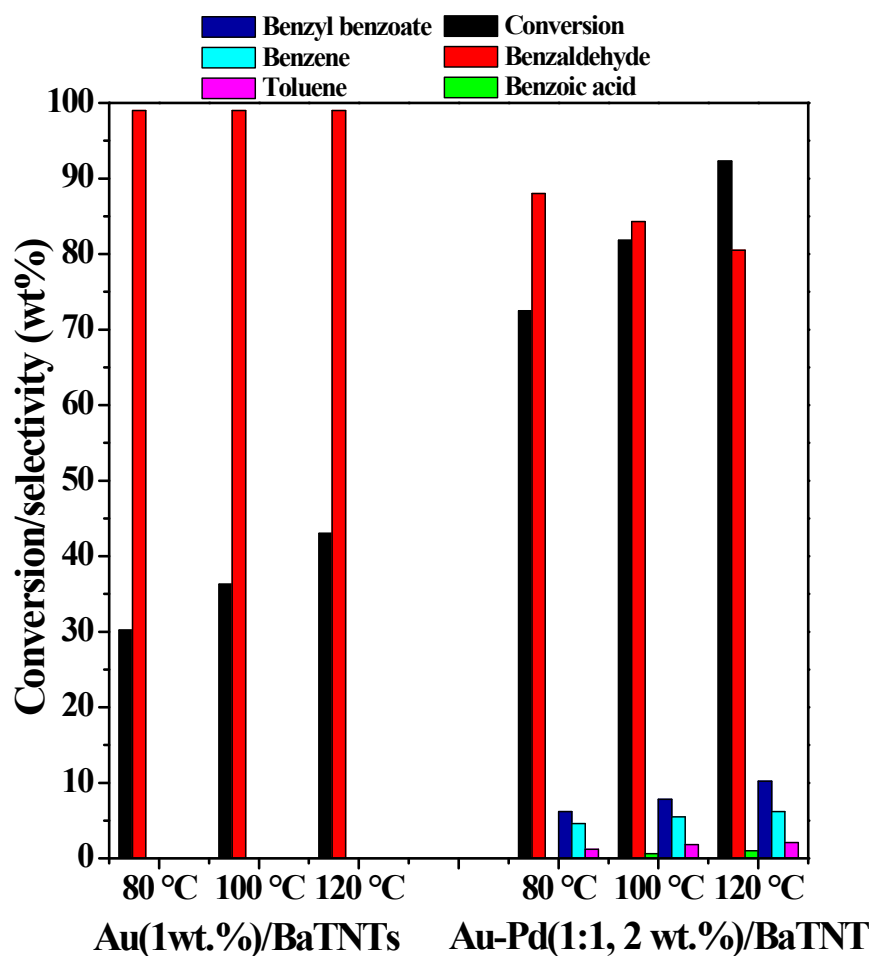

**S10(b)** Influence of reaction temperature on the catalytic activity and product selectivity of Au(1 wt%) and Au-Pd (2 wt%, 1:1) supported on BaTNT. Reaction conditions: catalyst = 0.05 g, benzyl alcohol = 25 mmol,  $p(\text{O}_2) = 1 \text{ atm}$ , reaction temperature = 80-120 °C and reaction time = 10 h for Au and 5 h for Au-Pd.

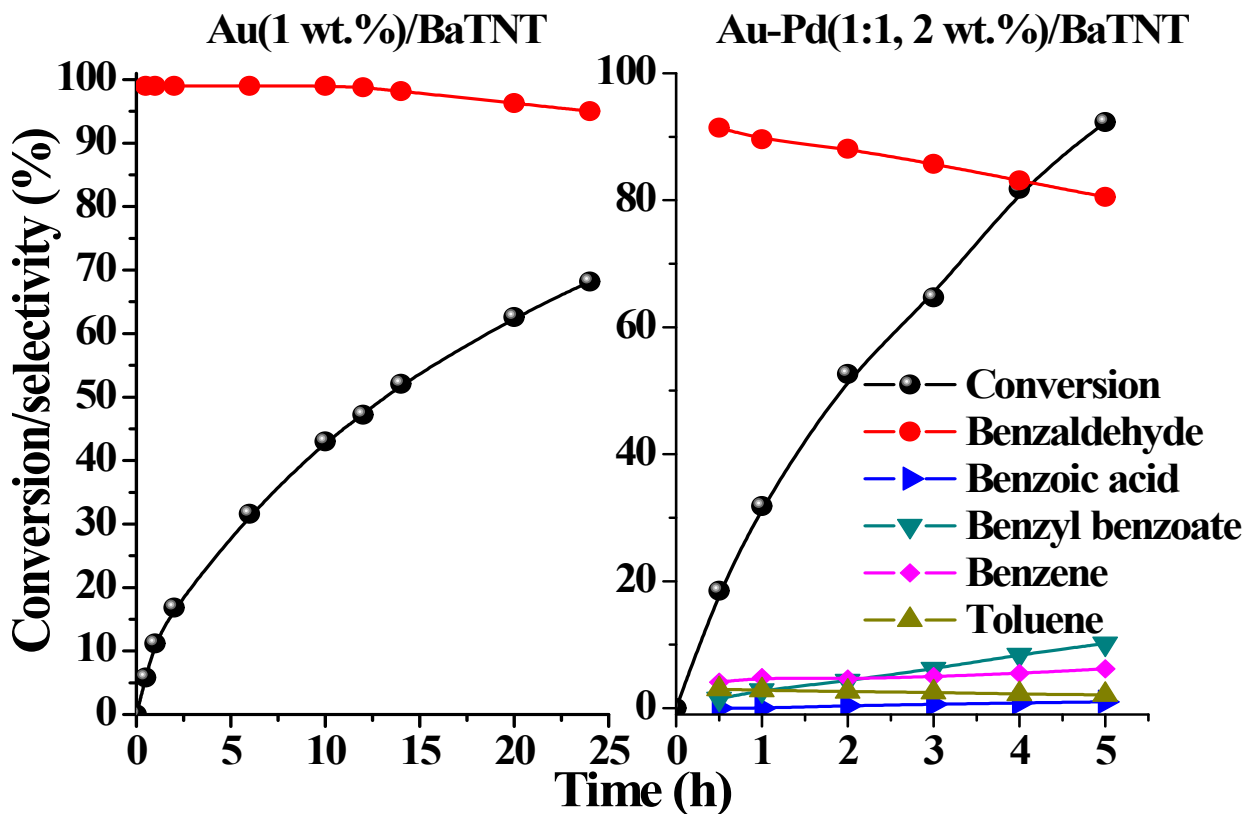

**S10(c).** Influence of Reaction time on the catalytic activity and product selectivity of Au(1 wt%) and Au-Pd (2 wt%, 1:1) supported on BaTNT. Reaction conditions: catalyst = 0.05 g, benzyl alcohol = 25 mmol,  $p(\text{O}_2) = 1 \text{ atm}$ , reaction temperature = 120 °C.

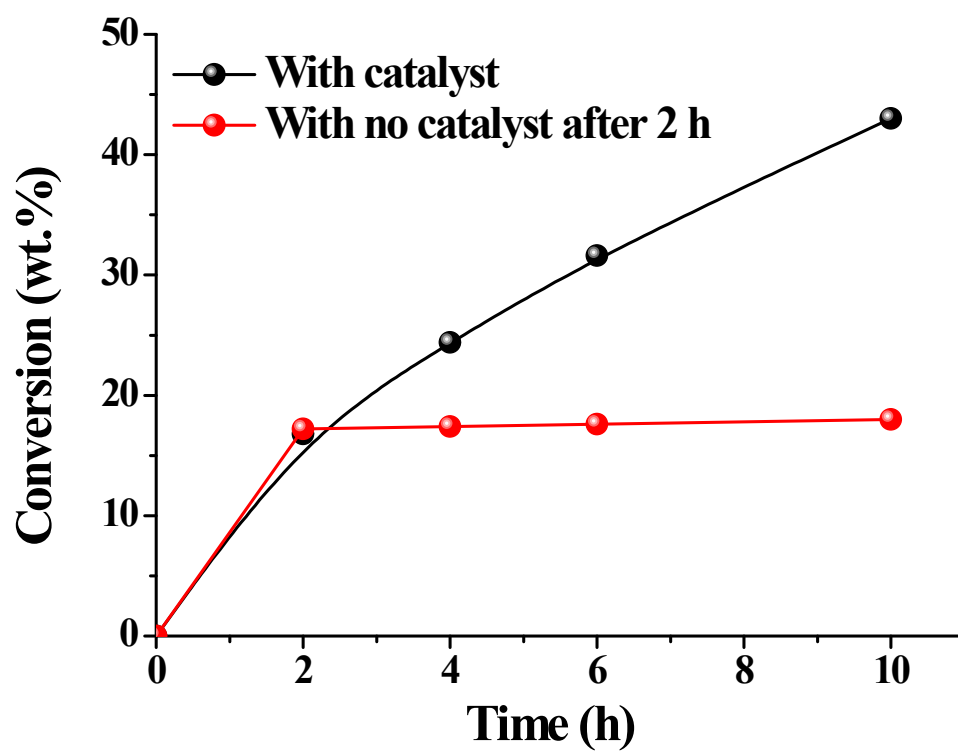

**S11.** Hot filtration test for oxidation of benzyl alcohol over Au(1 wt%)/BaTNT. Reaction conditions: catalyst = 0.05 g, benzyl alcohol = 25 mmol,  $p(\text{O}_2) = 1 \text{ atm}$ , reaction temperature = 120 °C, and reaction time = 10 h.
